# Supplementary material for: Hygroscopic growth of water soluble organic carbon isolated from atmospheric aerosol collected at US national parks and Storm Peak Laboratory
Source: Copernicus journal article supplement (doi:10.5194/acp-17-2555-2017), 2017-02-20
Supplement: Supplementary file 1 [file acp-17-2555-2017-supplement.zip]

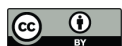

## *Supplement of*

# **Hygroscopic growth of water soluble organic carbon isolated from atmospheric aerosol collected at US national parks and Storm Peak Laboratory**

**Nathan F. Taylor et al.**

*Correspondence to:* Don R. Collins (dcollins@tamu.edu)

- acp-17-2555-2017-supplement-title-page.pdf
- Hygroscopic Growth and CCN activity of all samples
  - Acad Hygroscopicity.txt
  - Acadia CCN.txt
  - GRSM(S) Hygroscopicity.txt
  - GRSM(W) Hygroscopicity.txt
  - MORA CCN.txt
  - MORA Hygroscopicity.txt
  - Measurement site data.txt
  - Readme.txt
  - SPL CCN.txt
  - SPL Hygroscopicity.txt

The copyright of individual parts of the supplement might differ from the CC-BY 3.0 licence.
